# Supplementary material
Source: publisher figshare collection journal article supplement (https://springernature.figshare.com/ndownloader/files/17280689)
Supplement: Supplementary file [file 17280689]

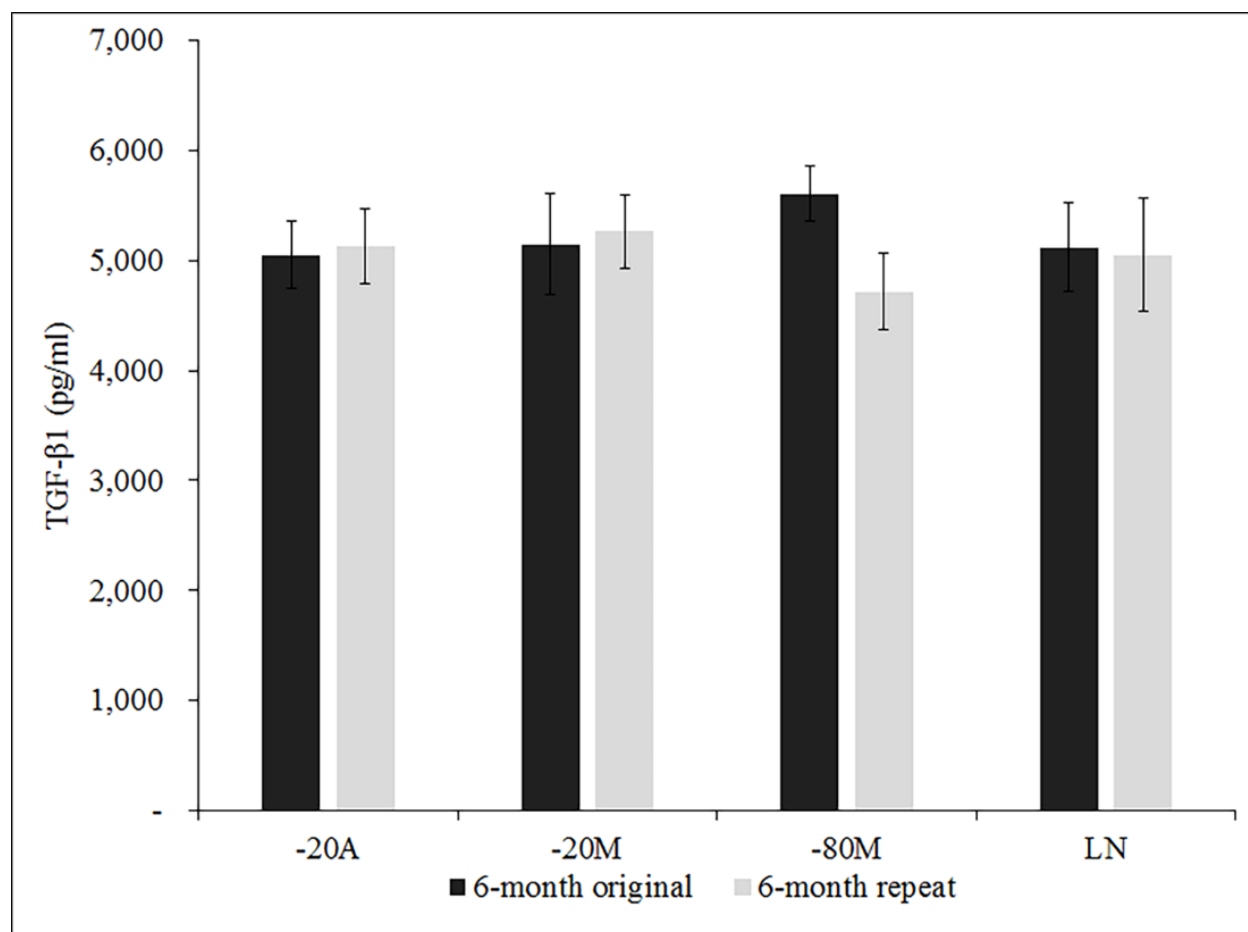

**Additional file 1:** Transforming growth factor-β1 (TGF- β1) concentrations at original 6-month and re-peat 6-months of storage in -20°C automatic defrost freezer (-20A), -20°C manual defrost freezer (-20M), -80°C manual defrost freezer (-80M), and liquid nitrogen (LN). All samples were activated with bovine thrombin and calcium chloride prior to protein quantification. Bars represent mean (n=6) ± standard error. There was no significant difference between original and repeat data when compared using a paired t-test,  $p < 0.05$ .
